# Supplementary material
Source: PubMed Central journal article supplement (PMC2856290)
Supplement: supp_M110.105890_jbc.M110.105890-9.pdf [file supp_M110.105890_jbc.M110.105890-9.pdf]

Supplementary Table1.

| Protein (Expression constructs)          | Residues  | Vector     | Restriction sites 5', 3' | Tags N/C       |                            |
|------------------------------------------|-----------|------------|--------------------------|----------------|----------------------------|
| Tpr-N                                    | 1-774     | pJET1.2    | blunt end                | none           |                            |
| Tpr-M                                    | 775-1700  | pJET1.2    | blunt end                | none           |                            |
| Tpr-C                                    | 1701-2351 | pJET1.2    | blunt end                | none           |                            |
| DLC                                      | 1-89      | pET28a-GST | NheI, HindIII            | His6, GST/none |                            |
| DIC                                      | 1-645     | pET28a-GST | NheI, HindIII            | His6, GST/none |                            |
| Mad1                                     | 1-718     | pET28a-GST | NdeI, BamHI              | His6, GST/none |                            |
| Immunofluorescence microscopy constructs | Residues  | Vector     | Restriction sites 5', 3' | Tags N/C       |                            |
| Tpr                                      | 1-7092    | pEGFP-N1   |                          | none/GFP       | gift from Dr. Larry Gerace |
| Tpr-N                                    | 1-774     | pEGFP-C1   | BamHI                    | GFP/none       |                            |
| Mad1                                     | 1-718     | pEGFP-C1   | HindIII, BamHI           | GFP/none       |                            |
